# Supplementary material
Source: PubMed Central journal article supplement (PMC9833998)
Supplement: sj-pdf-1-lup-10.1177_09612033221151012.pdf [file sj-pdf-1-lup-10.1177_09612033221151012.pdf]

## Supplementary Tables

Table 1: Antibody titers of SLE patients completing the study.

| Patients | BAU/mL T1 | BAU/mL T2 | BAU T3 |
|----------|-----------|-----------|--------|
| 1        | 507       | 41.4      | 1440   |
| 2        | 2470      | 121       | 1840   |
| 3        | 1370      | 251       | 1720   |
| 4        | 532       | 26.3      | 468    |
| 5        | 8850      | 381       | 524    |
| 6        | 1610      | 234       | 2580   |
| 7        | 912       | 162       | 1150   |
